# Supplementary material for: Acceptability of tDCS in treating stress-related mental health disorders: a mixed methods study among military patients and caregivers
Source: Springer Nature journal article supplement (doi:10.1186/s12888-021-03086-5), 2021-02-15
Supplement: MOESM1 [file 18863132]

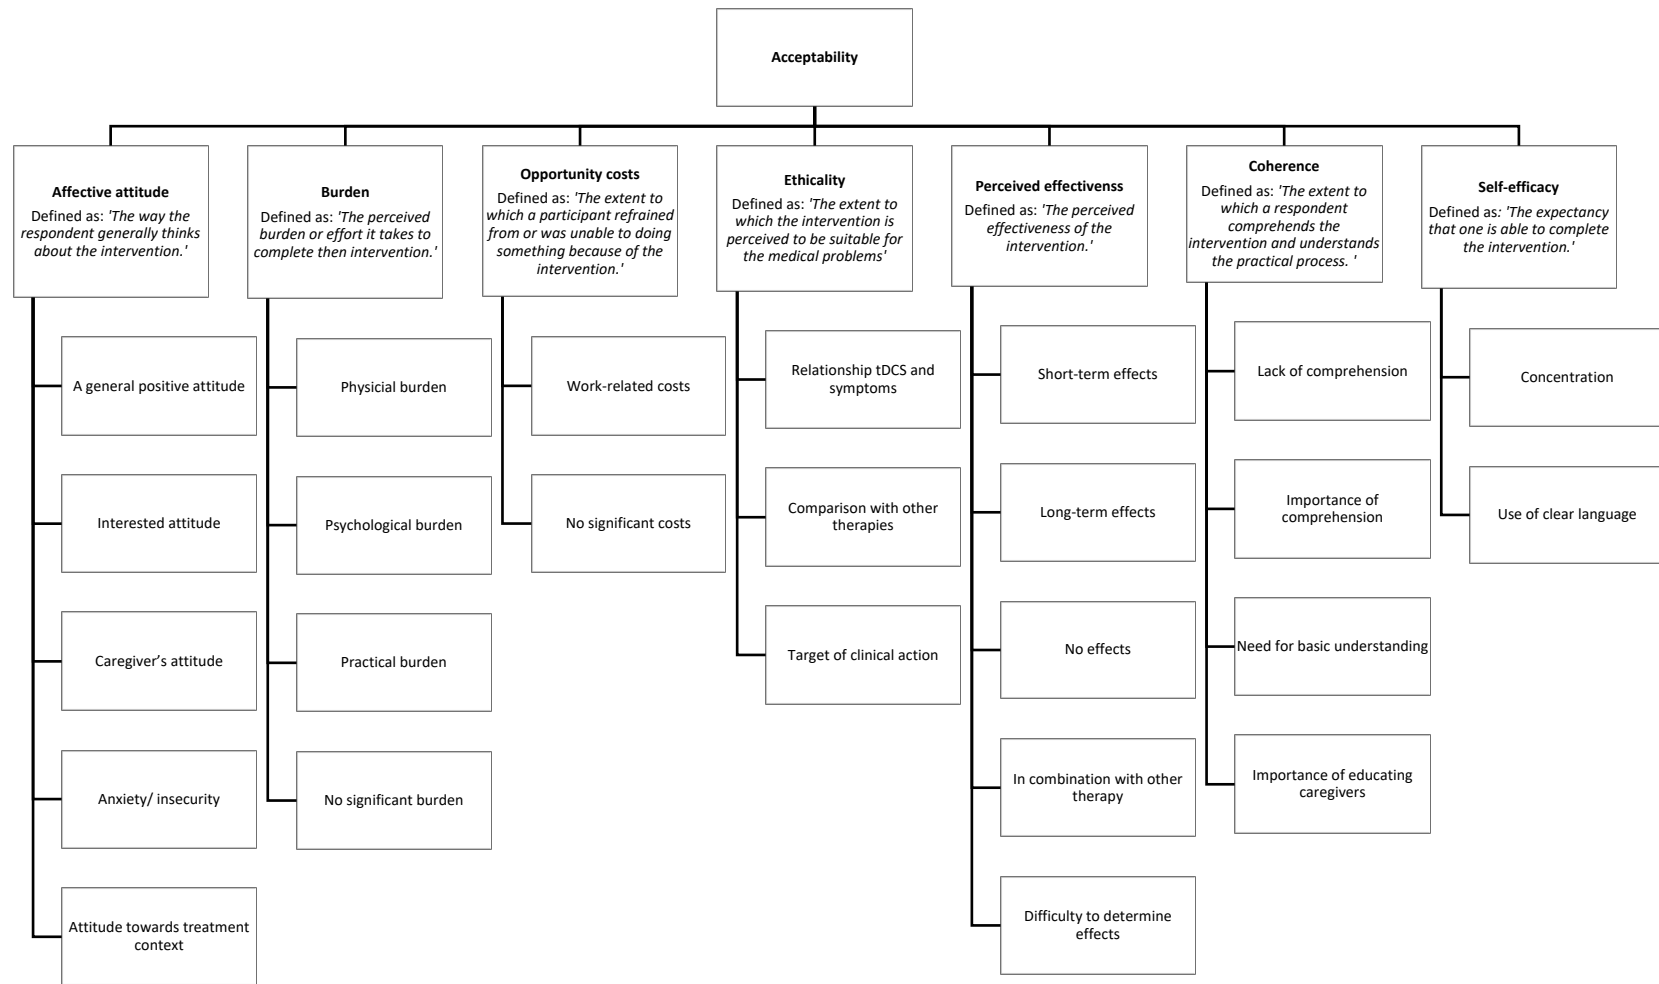

Final coding scheme.
